# Supplementary material for: Evaluation of Ortho VITROS and Roche Elecsys S and NC Immunoassays for SARS-CoV-2 Serosurveillance Applications
Source: PubMed Central journal article supplement (PMC10434072; doi:10.1128/spectrum.03234-22), 2023-06-22
Supplement: spectrum.03234-22-s0001.pdf [file spectrum.03234-22-s0001.pdf]

## Supplementary Materials

**Table S1.** Weighted geometric means for each assay and time period. 95% CI was calculated using a bootstrapping method.

| Assay    | Time Period         |                     |
|----------|---------------------|---------------------|
|          | 0-60 Days           | 100+ Days           |
| Ortho S  | 215.6 (146.2-289.4) | 286.6 (221.9-370.2) |
| Ortho NC | 119.6 (96.3-142.9)  | 109.2 (75.1-150.6)  |
| Roche S  | 128.0 (87.2-182.4)  | 168.4 (132.2-211.4) |
| Roche NC | 114.3 (78.3-157.6)  | 61.8 (30.5-120.5)   |
